# Supplementary material
Source: PubMed Central journal article supplement (PMC4892959)
Supplement: NIHMS747586-supplement-supplement_1.pdf [file NIHMS747586-supplement-supplement_1.pdf]

## Supplementary Table

## A. Expression pattern of each gene

## 1. Transcription Factors

| Annotation                                            | Gene ID # or Antibody Information | Expression pattern at P10                                          |
|-------------------------------------------------------|-----------------------------------|--------------------------------------------------------------------|
| Pou domain, class 3, transcription factor 3 (Pou3f3)  | goat (Santa Cruz, sc-6028)        | by IHC, ubiquitous expression                                      |
| Brain-specific homeobox/POU domain protein 3a (Brn3a) | mouse (Millipore, MAB1585)        | by IHC, ubiquitous expression                                      |
| Diencephalon/mesencephalon homeobox 1 (Dmbx1)         | NM_130865                         | by ISH, ubiquitous expression (more abundant in superficial layer) |
| Meis homeobox 2 (Meis2)                               | goat (Santa Cruz, sc-10600)       | by IHC, ubiquitous expression (strong in deep layer)               |
| Orthodenticle homolog 2 (Otx2)                        | NM_001286483                      | by ISH, ubiquitous expression (more abundant in superficial layer) |
| T-box brain gene 1 (Tbr1)                             | NM_009322                         | by ISH, no expression                                              |
| Transducin-like enhancer of split 4 (Tle4)            | rabbit (Santa Cruz, sc-9125)      | by IHC, ubiquitous expression                                      |

## 2. Cell Surface Molecules

| Annotation                                                               | Gene ID#     | Expression pattern at P5/P10 by ISH |
|--------------------------------------------------------------------------|--------------|-------------------------------------|
| Contactin 2                                                              | BC053033     | no expression                       |
| Neighbor of Punc e11 protein (Nope)                                      | AF176694     | no expression                       |
| Immunoglobulin superfamily, DCC subclass, member 3                       | BC053057     | no expression                       |
| Protogenin homolog                                                       | NM_175485    | no expression                       |
| Immunoglobulin superfamily member 9 (IGSF9)                              | AF317839     | no expression                       |
| Cell adhesion molecule-related/down-regulated by oncogenes (Cdon)        | NM_021339    | no expression                       |
| Cdon binding protein (Boc)                                               | NM_172506    | no expression                       |
| Leucine rich repeat and fibronectin type III domain containing 1 (Lrfn1) | NM_001141921 | no expression                       |
| Obscurin-like 1 (Obsl1)                                                  | NM_178884    | no expression                       |

|                                                            |              |                                              |
|------------------------------------------------------------|--------------|----------------------------------------------|
| Cell adhesion molecule 1 (Cadm1)                           | NM_207675    | deep layer (very sparse expression)          |
| Cell adhesion molecule 4 (Cadm4)                           | NM_153112    | ubiquitous expression                        |
| Cell adhesion molecule 2 (Cadm2)                           | NM_178721    | ubiquitous expression                        |
| Cell adhesion molecule 3 (Cadm3)                           | NM_053199    | ubiquitous expression (strong in deep layer) |
| Poliovirus receptor-related 1                              | NM_021424    | no expression                                |
| Poliovirus receptor-related 2                              | BC046770     | no expression                                |
| Poliovirus receptor-related 3                              | NM_021496    | no expression                                |
| Poliovirus receptor-related 4                              | BC024948     | no expression                                |
| Nephrin (Nphs1)                                            | AF191090     | no expression                                |
| Kin of IRRE like 2                                         | BC052773     | no expression                                |
| NEPH1                                                      | AY243095     | no expression                                |
| Kin of IRRE like 3 (Kirrel 3)                              | NM_001190912 | ubiquitous expression (strong in deep layer) |
| Endothelial cell-selective adhesion molecule (Esam)        | AF361882     | no expression                                |
| Immunoglobulin superfamily member 11 (IGSF11)              | NM_170599    | no expression                                |
| Junctional adhesion molecule (JAM)                         | U89915       | no expression                                |
| Vascular endothelial junction-associated molecule          | AF255911     | no expression                                |
| Junctional cell adhesion molecule 3 (JAM3)                 | AK008187     | no expression                                |
| Cell surface protein MCAR                                  | U90715       | ubiquitous expression (strong in deep layer) |
| SLAM family member 9                                       | BC019477     | no expression                                |
| 16-domain form of sialoadhesin                             | Z36233       | no expression                                |
| follistatin-like 4 (Fstl4)                                 | NM_177059    | no expression                                |
| CXADR-like membrane protein (CLMP)                         | NM_133733    | no expression                                |
| Similar to microfibril-associated glycoprotein 3 precursor | AK076071     | no expression                                |
| V-set and immunoglobulin domain containing 2 (Vsig2)       | NM_020518    | no expression                                |
| Immunoglobulin superfamily, member 1 (Igsf1)               | NM_177591    | no expression                                |
| MMAC8                                                      | AB065156     | no expression                                |
| CD83 antigen                                               | AF001036     | no expression                                |
| S-glycerin/MUC18                                           | AB035509     | no expression                                |
| Lipolysis stimulated lipoprotein receptor                  | BC004672     | no expression                                |

|                                                                                  |              |                                     |
|----------------------------------------------------------------------------------|--------------|-------------------------------------|
| Family with sequence similarity 187, member B (Fam187b)                          | NM_175240    | no expression                       |
| Leucine rich repeat and fibronectin type III domain containing 4 (Lrfn4)         | NM_153388    | no expression                       |
| Leucine rich repeat and fibronectin type III domain containing 2 (Lrfn2)         | NM_027452    | no expression                       |
| Adhesion G protein-coupled receptor A2 (Adgra2)                                  | NM_054044    | no expression                       |
| G protein-coupled receptor 125                                                   | BC052391     | no expression                       |
| Receptor tyrosine kinase-like orphan receptor 1 (ROR1)                           | AB010383     | no expression                       |
| Receptor tyrosine kinase-like orphan receptor 2 (ROR2)                           | NM_013846    | no expression                       |
| Interleukin 1 receptor accessory protein (IL1RAP)                                | NM_008364    | no expression                       |
| Leucine rich repeat containing 4C (Lrrc4c)                                       | NM_001289744 | ubiquitous expression (very weak)   |
| Neurotrimin                                                                      | BC023307     | ubiquitous expression (very weak)   |
| Neuronal growth regulator 1                                                      | AK035218     | ubiquitous expression (very weak)   |
| Limbic system-associated membrane protein (Lsamp)                                | NM_175548    | no expression                       |
| LgLON family member 5 (lgln5)                                                    | NM_001164518 | ubiquitous expression (very weak)   |
| Similar to opioid binding protein/cell adhesion molecule precursor OBCAM (Opcml) | XM_284477    | ubiquitous expression               |
| Intercellular adhesion molecule 5, Telencephalin (ICAM5)                         | NM_008319    | no expression                       |
| Semaphorin 3B                                                                    | XM_203212    | no expression                       |
| Semaphorin 4B                                                                    | XM_133534    | no expression                       |
| Triple functional domain (PTPRF interacting)                                     | BC051169     | ubiquitous expression (very sparse) |
| Receptor tyrosine kinase (DTK)                                                   | U18933       | no expression                       |
| AXL receptor tyrosine kinase                                                     | BC050914     | no expression                       |
| Obscurin, cytoskeletal calmodulin and titin-interacting RhoGEF                   | BC046431     | no expression                       |
| c-fms proto-oncogene                                                             | X06368       | no expression                       |
| Kinase insert domain protein receptor (KDR)                                      | NM_010612    | no expression                       |
| Deleted in colorectal carcinoma (DCC)                                            | NM_007831    | no expression                       |
| Brain tumor-associated protein (MBAG1)                                           | AF300458     | ubiquitous expression (very weak)   |
| Neuronal growth regulator 1 (Negr1)                                              | NM_177274    | no expression                       |
| MPTP delta                                                                       | D13905       | no expression                       |
| Protein tyrosine phosphatase, receptor type, A (PTPRA)                           | BC050930     | no expression                       |

|                                                                              |              |                                                     |
|------------------------------------------------------------------------------|--------------|-----------------------------------------------------|
| Ftp-1                                                                        | D88187       | no expression                                       |
| Protein tyrosine phosphatase, receptor type, M (PTPRM)                       | NM_008984    | no expression                                       |
| Protein tyrosine phosphatase, receptor type, T (PTPRT)                       | NM_021464    | ubiquitous expression (strong in superficial layer) |
| DBA/2J protein tyrosine phosphatase, receptor type, deltaA (Ptpd)            | AF326560     | no expression                                       |
| Tyrosine phosphatase LAR (Ptpf)                                              | AF300943     | no expression                                       |
| Protein tyrosine phosphatase, receptor type, K (Ptpk)                        | NM_008983    | no expression                                       |
| Protein tyrosine phosphatase PTPT9                                           | D28530       | no expression                                       |
| FMS-like tyrosine kinase 1 (Flt1)                                            | NM_010228    | no expression                                       |
| Flt3 mRNA for tyrosine kinase receptor of the PDGF                           | X59398       | no expression                                       |
| Tyr kinase receptor 1                                                        | AK052413     | no expression                                       |
| Tek                                                                          | X67553       | no expression                                       |
| Protein tyrosine kinase 7 (Ptk7)                                             | NM_175168    | no expression                                       |
| Chondroadherin                                                               | BC012672     | no expression                                       |
| Transmembrane protein AMIGO                                                  | AY237008     | no expression                                       |
| Transmembrane protein AMIGO 2                                                | AY237006     | no expression                                       |
| Transmembrane protein AMIGO 3                                                | AY237004     | no expression                                       |
| Vasorin                                                                      | BC050274     | no expression                                       |
| Leucine rich repeat and Ig domain containing 2 (Lingo2)                      | NM_175516    | no expression                                       |
| Leucine-rich repeat, immunoglobulin-like and transmembrane domains 1 (Lrit1) | BC032270     | no expression                                       |
| Leucine-rich repeat, immunoglobulin-like and transmembrane domains 3 (Lrit3) | NM_001205102 | no expression                                       |
| Leucine-rich repeat, immunoglobulin-like and transmembrane domains 2 (Lrit2) | NM_173418    | no expression                                       |
| Immunoglobulin superfamily containing leucine-rich repeat (Islr)             | AB024539     | no expression                                       |
| Leucine rich repeat and fibronectin type III domain containing 1 (Lrfn1)     | NM_030562    | no expression                                       |
| Leucine-rich repeats and immunoglobulin-like domains 1 (Lrig-1)              | NM_008377    | no expression                                       |
| Leucine-rich-repeat protein (NLRP-1)                                         | D45913       | deep layer (very weak expression)                   |

|                                                                            |              |                                              |
|----------------------------------------------------------------------------|--------------|----------------------------------------------|
| Leucine rich repeat protein 2, neuronal (Lrrn2)                            | NM_010732    | no expression                                |
| Leucine rich repeat protein 3, neuronal (Lrrn3)                            | XM_126894    | no expression                                |
| Leucine rich repeat and Ig domain containing 1                             | BC052384     | ubiquitous expression (strong in deep layer) |
| Hypothetical leucine-rich repeat containing protein                        | AK040916     | no expression                                |
| Leucine rich repeat containing 4B (Lrrc4b)                                 | NM_198250    | no expression                                |
| Leucine rich repeat and fibronectin type III domain containing 5           | AK083920     | ubiquitous expression                        |
| Leucine-rich repeats and immunoglobulin-like domains 2 (Lrig2)             | NM_001025067 | no expression                                |
| Peroxidasin homolog                                                        | NM_181395    | no expression                                |
| Immunoglobulin superfamily containing leucine-rich repeat 2 (Islr2)        | NM_177193    | ubiquitous expression                        |
| RIKEN, clone:6430402H13                                                    | AK078176     | no expression                                |
| V-set and immunoglobulin domain containing 10 (Vsig10)                     | NM_001033311 | no expression                                |
| RIKEN 2210407G14                                                           | NM_028217    | no expression                                |
| Roundabout homolog 3 (Robo3)                                               | NM_001164767 | no expression                                |
| RIKEN 8030485G08                                                           | AK078783     | no expression                                |
| Adhesion G protein-coupled receptor F5 (Adgrf5)                            | NM_001081178 | no expression                                |
| Immunoglobulin superfamily, member 8 (IGSF#8)                              | BC026633     | no expression                                |
| Hemicentin 1                                                               | NM_001024720 | no expression                                |
| Similar to mucosa associated lymphoid tissue lymphoma translocation gene 1 | AK045200     | no expression                                |
| Differentiation antigen (CD22)                                             | L16928       | no expression                                |
| HEPACAM family member 2 (Hepacam2)                                         | NM_178899    | no expression                                |
| Hepatitis virus receptor                                                   | M77196       | no expression                                |
| SPEG complex locus                                                         | BC048698     | no expression                                |
| Platelet/endothelial cell adhesion molecule 1 (Pecam1)                     | NM_008816    | no expression                                |
| Secreted and transmembrane 1A                                              | BC010462     | no expression                                |
| Hypothetical Microbodies C-terminal targeting signal containing protein    | AK045585     | no expression                                |
| Alpha-1-B glycoprotein (A1bg)                                              | NM_001081067 | no expression                                |
| Hypothetical Immunoglobulin subtype containing protein                     | AK034938     | no expression                                |

|                                                                                            |              |                       |
|--------------------------------------------------------------------------------------------|--------------|-----------------------|
| Immunoglobulin superfamily, member 10 (Igsf10)                                             | NM_001162884 | no expression         |
| Lymphocyte antigen 9 (Ly9)                                                                 | NM_008534    | no expression         |
| Basigin                                                                                    | Y16256       | no expression         |
| Neuroplastin (Nptn)                                                                        | NM_009145    | no expression         |
| Hypothetical Immunoglobulin and major histocompatibility complex domain containing protein | AK053685     | no expression         |
| V-set immunoregulatory receptor (Vsir)                                                     | NM_028732    | no expression         |
| F2 alpha prostaglandin regulatory protein (FPRP)                                           | AF152344     | no expression         |
| Immunoglobulin superfamily, member 3 (Igsf3)                                               | NM_207205    | no expression         |
| Embigin                                                                                    | BC014858     | no expression         |
| Nexilin                                                                                    | NM_199465    | no expression         |
| Myelin protein zero-like 2 (Mpzl2)                                                         | NM_007962    | no expression         |
| Sodium channel, voltage-gated type III, beta (Scn3b)                                       | NM_178227    | no expression         |
| Adhesion molecule, interacts with CXADR antigen 1                                          | BC050133     | no expression         |
| Immunoglobulin-like receptor PIRA1                                                         | U96682       | no expression         |
| Adipocyte-specific protein 3 (ASP3)                                                        | AB040488     | no expression         |
| V-set and transmembrane domain containing 2B (Vstm2b)                                      | NM_021387    | no expression         |
| Immunoglobulin-like domain containing receptor 1 (Ildr1)                                   | NM_134109    | no expression         |
| Fc receptor-like S, scavenger receptor (Fcrls)                                             | NM_030707    | no expression         |
| Collagen, type XXV, alpha 1 (Col25a1)                                                      | NM_001244952 | ubiquitous expression |

### 3. Neuropeptides/ Calcium Binding Proteins

| Annotation                            | Gene ID # or Antibody Information | Expression pattern at P10      |
|---------------------------------------|-----------------------------------|--------------------------------|
| Calbindin                             | Rabbit (Swant, CB-38a)            | by IHC (ubiquitous expression) |
| Calretinin                            | Mouse (Millipore, MAB1568)        | by IHC (no soma expression)    |
| Cholecystokinin (Cck)                 | NM_031161                         | by ISH (ubiquitous expression) |
| Corticotropin releasing hormone (Crh) | NM_205769                         | by ISH (no expression)         |
| Neuropeptide Y (NPY)                  | Rabbit (Bachem, T-4069)           | by IHC (no expression)         |

**B. Primer sequences for in situ probes****1. Transcription Factors**

| <b>Annotation</b>                                     | <b>Forward Primer</b> | <b>Reverse Primer</b> |
|-------------------------------------------------------|-----------------------|-----------------------|
| Pou domain, class 3, transcription factor 3 (Pou3f3)  | -                     | -                     |
| Brain-specific homeobox/POU domain protein 3a (Brn3a) | -                     | -                     |
| Diencephalon/mesencephalon homeobox 1 (Dmbx1)         | ATCATCTTGGAGGCCCGC    | AGGTTTTCAATGCTCGTG    |
| Meis homeobox 2 (Meis2)                               | -                     | -                     |
| Orthodenticle homolog 2 (Otx2)                        | TCCAGCTCGGGAAGTGAG    | AGGCCATGACCTTCCCTC    |
| T-box brain gene 1 (Tbr1)                             | CGCACTCGCTCTTTCCTTG   | CACCTGCACAGACCAGTAATG |
| Transducin-like enhancer of split 4 (Tle4)            | -                     | -                     |

**2. Cell Surface Molecules**

| <b>Annotation</b>                                                        | <b>Forward Primer</b>    | <b>Reverse Primer</b>     |
|--------------------------------------------------------------------------|--------------------------|---------------------------|
| Contactin 2                                                              | TACAGCAACGATAGCATCCATCCC | GAGCGTGACCAATGTCTTCAGGTA  |
| Neighbor of Punc e11 protein (Nope)                                      | TCGGTGGAAGAAGCCAGACTTTAC | GTGCACATCCAAGGAGTCTGAGAA  |
| Immunoglobulin superfamily, DCC subclass, member 3                       | ACGGACGATGAGAGGTACACACTA | TCTCAGCCACACATTGGTAGATGG  |
| Protogenin homolog                                                       | ACCAGATCCTTCTACATGCCAACC | ATTGTACAGTGGTCTCTCCCAAGC  |
| Immunoglobulin superfamily member 9 (IGSF9)                              | ATGATTTGGTGTCTCCGTCTGACC | TTCCAAGTCACATAAGGCTGAGGG  |
| Cell adhesion molecule-related/down-regulated by oncogenes (Cdon)        | AAGCTGAGGTGCGCTATAAGATCC | GGCTGTGCGTTATGAAACCAGGTG  |
| Cdon binding protein (Boc)                                               | GCAGGACCTTACATCACCTTCACT | TGTGTACTGGCACGAAGAAGACAG  |
| Leucine rich repeat and fibronectin type III domain containing 1 (Lrfn1) | CGCCTATGATTTGTGTGTGTTGGC | CGTCGAAGGAATAGCGTTGTTGTG  |
| Obscurin-like 1 (Obsl1)                                                  | TGCCCTCACTATCCAAGAAAGCTC | TGAAGTAGGCACGTTTCATCTCCTG |
| Cell adhesion molecule 1 (Cadm1)                                         | TCGATATCCAGAAAGACACGGCAG | TCCGAATGAGCCTTTCCCACTATG  |
| Cell adhesion molecule 4 (Cadm4)                                         | AAGGACGACGGTGGTATTGTCATC | CTTCTTTCCGTTTGTGTCCATCGC  |

|                                                                          |                          |                           |
|--------------------------------------------------------------------------|--------------------------|---------------------------|
| Cell adhesion molecule 2 (Cadm2)                                         | GAAGGGACCATGATTTGGAAACGC | AAGGTCTTTCGGTTAGCATCCTCC  |
| Cell adhesion molecule 3 (Cadm3)                                         | CTCAGCATCAGCATCAGCAATGTG | GTAGGCTGTATAGCTGCCCATGTT  |
| Poliovirus receptor-related 1                                            | CAGATGTGAAGCTCACGTGCAAAG | AAGTCCAGCTGTTTCAGGGTCATAC |
| Poliovirus receptor-related 2                                            | TCCAGAAGTATCCATCTCCGGCTA | AAGGTGAAGAGTTGAGAGGGCATC  |
| Poliovirus receptor-related 3                                            | CAGCCAATACAAGCTGTTTCCCAC | GTCTGCAAAGGCAAGTGTTTCAGTC |
| Poliovirus receptor-related 4                                            | TCACTTCAGAGTTCATCTGGTGC  | AGCAGCTACTGTTGTCCTTGAGAC  |
| Nephrin (Nphs1)                                                          | AAGAGAGAAGACAATGGCCTGTCC | CGGTAGAAAGAGCTCACGGTTTCA  |
| Kin of IRRE like 2                                                       | GGAGAGAAGGTGACTTTCCTGTGT | TGTAGCACAGAAATAAGGCCAGGG  |
| NEPH1                                                                    | AACTTGGAGATCACAGATGCCGAG | TAAACCTCACAAGACACAGGCTCC  |
| Kin of IRRE like 3 (Kirrel 3)                                            | CAAGTCTACTCCTTCAGCCAGCAA | TGACGATGTTGTCCTCCAATACCG  |
| Endothelial cell-selective adhesion molecule (Esam)                      | GCCTCAACAAATTGGAAGCGGTAG | TAAGGCTGGTCCAAAGAAGACCTG  |
| Immunoglobulin superfamily member 11 (IGSF11)                            | CTTCTGCTCCACAATGCCAAATCC | ACTGCATTGCCAGAGAAAGACTGG  |
| Junctional adhesion molecule (JAM)                                       | TGATCCTGGGCTCTTTGGTACAAG | ATGGCTGTCCCATATCCATTCTGG  |
| Vascular endothelial junction-associated molecule                        | AAGACCACCGTCAAGAAGTCACAG | GCCAAGGCCACATACAGAAATCAC  |
| Junctional cell adhesion molecule 3 (JAM3)                               | TGAGGTCGTTGCTCTAAATGACCG | TTTGTGTCTGAAGTCACCCTCCTC  |
| Cell surface protein MCAR                                                | ACGAGTAACGATGTCAAGTCTGGC | TCTCTTCTCTGCGTTTCTGTGAC   |
| SLAM family member 9                                                     | CAACGCCCAAGTCAACTTGAAGAC | TCCCTAGAGCCTGAAACAAAGCTC  |
| 16-domain form of sialoadhesin                                           | AGACTTCTATGCTAATGTGGCCCG | CTGTGCCTTCACGCAGTGTATTTG  |
| folliculin-like 4 (Fstl4)                                                | TGTACATCACCAAGGTGACCACAG | ATGCCATCCTCAGCGAAGACATAG  |
| CXADR-like membrane protein (CLMP)                                       | TGCTCACCGATAATGAAGGGAACC | CATGCCAATGCTCTGCACATACTG  |
| Similar to microfibril-associated glycoprotein 3 precursor               | TCTCACGGTGGATCAGTATGGAGA | AATCTCCACCAGGAGAGTTGCTTC  |
| V-set and immunoglobulin domain containing 2 (Vsig2)                     | ACCCACCAGATTTCTACCCAACG  | AGCTCTTTGCTATGATCGGCTCTC  |
| Immunoglobulin superfamily, member 1 (Igsf1)                             | AGAAGCCCATCTGGCTCAACTAAG | CCATCACCAATGCCACTGAAATG   |
| MMAC8                                                                    | TGAATCCCTGAGTGTGTCATGTCG | TCTGGATGCCTATCAGCTTTGACC  |
| CD83 antigen                                                             | CTCCAGCTCCTGTTTCTAGGCTG  | ACCGTTTCTGTCTTAGGAAGGGTC  |
| S-glycerin/MUC18                                                         | TGAGTGCACGCCTAGTTAAGGAAG | TCTCAGCCACTCAAACCTCAAGGTC |
| Lipolysis stimulated lipoprotein receptor                                | ACAGGAAATGCTGACCTGACCTTC | AAGATACGCTCCCATCCACTTCAC  |
| Family with sequence similarity 187, member B (Fam187b)                  | TACTCTGTGGCTGGTTGGTCTTTC | ATAGCAGTAGCCTAGACGTTTGCG  |
| Leucine rich repeat and fibronectin type III domain containing 4 (Lrfn4) | ATGCAGGAGCCTATACCTGCATTG | AAGGCCACAGTGAAGACCAGTAAG  |



|                                                                                  |                           |                              |
|----------------------------------------------------------------------------------|---------------------------|------------------------------|
| Leucine rich repeat and fibronectin type III domain containing 2 (Lrfn2)         | GCACTGCAATTGTGAGCTTCTCTG  | AGATGTGGTGGTAACATCGGACAC     |
| Adhesion G protein-coupled receptor A2 (Adgra2)                                  | ACTGAGTTTCTGACCTGTGACTGC  | ACTGTAAACAGGACTGGTAAGCCG     |
| G protein-coupled receptor 125                                                   | TGGACCTGACGAACAACCGAATAG  | TGGGACTCATCGGTCTCAACAATG     |
| Receptor tyrosine kinase-like orphan receptor 1 (ROR1)                           | TGTCTACCACTGGTGTCTTGTGTTG | TGGGTACTGAGAATTCATGGCTG      |
| Receptor tyrosine kinase-like orphan receptor 2 (ROR2)                           | TTGTCCACAGTGAGGTTTCATGGAG | CTGAGATCCTCACGTTTCAGCTTGT    |
| Interleukin 1 receptor accessory protein (IL1RAP)                                | GCTGCCAAGGTGAAACAGAAAGTC  | CCTGCCCTGAGGATACTTGGATTT     |
| Leucine rich repeat containing 4C (Lrrc4c)                                       | TTCGGGAAATCCCTAACCTCACAC  | TAGAAGCCCGACATTTTCAGCTCAG    |
| Neurotrimin                                                                      | ACCCAGTACAGCATTGAGATCCAG  | CCCTTCTTTCTTCGACCAGTCTT      |
| Neuronal growth regulator 1                                                      | TGTAACAGATGATGGCCCGTACAC  | CACTGTGAGGATGGATCTTGTGCT     |
| Limbic system-associated membrane protein (Lsamp)                                | GTCAGGCAAATATGAGTGCAAGGC  | ACCATCTCCACTCTGCTTTCAGTG     |
| LgLON family member 5 (lgln5)                                                    | TGCCCGTATTGTGAACATCTCCTC  | TGCGCTGTACTGAATGGTGTCTAC     |
| Similar to opioid binding protein/cell adhesion molecule precursor OBCAM (Opcml) | TATTCCTTGTACCCACAGGAGTGC  | TGGTCCTGAGATGGCGTATTGATG     |
| Intercellular adhesion molecule 5, Telencephalin (ICAM5)                         | TCTGACTTTGAGTGAGCCAGAAGC  | CATATTCCACGGTCAGGGTCACAT     |
| Semaphorin 3B                                                                    | GAATGGCGTGAAGAATGCAACTGG  | AACTCCAGGTAAGTACTGAGCACACAAG |
| Semaphorin 4B                                                                    | ATCAAGATCCTCCTGCCACTCAAC  | AGGGTGAAGACATCTTGTAGCACG     |
| Triple functional domain (PTPRF interacting)                                     | TCTACAGTGAAGTGGCTGAGCTTG  | CACACGAATTCTTTGGCCTTCTGG     |
| Receptor tyrosine kinase (DTK)                                                   | ACCACAGTAACAACGATCTCCAGC  | ATGGTCATGAGAAGACACCACCAG     |
| AXL receptor tyrosine kinase                                                     | AACTCCAGGCCTGAACAAGACATC  | TGTCACAGACACAGTCAGGTTAGC     |
| Obscurin, cytoskeletal calmodulin and titin-interacting RhoGEF                   | TTAAGAGACTGCACCACCCACATC  | AATGAACTCTGCAGGAAGGCTACG     |
| c-fms proto-oncogene                                                             | AGAGGTCAGTGTTACATGGATGCC  | AACTCCCCTTCTCATTGTAGGGC      |
| Kinase insert domain protein receptor (KDR)                                      | CATTGCCTGGTCAAACAGCTCATC  | GCAAGTCGCTGTCTTGTCAATTCC     |
| Deleted in colorectal carcinoma (DCC)                                            | AACTTCTGCTCCCAAGGATCTGAC  | AGGTTGCTGTTCTTCTGAGGAGTG     |
| Brain tumor-associated protein (MBAG1)                                           | TTCCCTCGTGGAACTCAACTTAGC  | GTGTCTATGAGCAGCACACGAGAA     |
| Neuronal growth regulator 1 (Negr1)                                              | TGTAACAGATGATGGCCCGTACAC  | TCACTGTGAGGATGGATCTTGTGC     |
| MPTP delta                                                                       | TAGTTGTACCAGCCCAAGTTCCAC  | ACCATCTCCTTTGGTGGTGTAAAGC    |
| Protein tyrosine phosphatase, receptor type, A (PTPRA)                           | AAACATCCTGCCCTATGACCACTC  | GGTTACAGGCCTTCACCTTCTTGA     |
| Ftp-1                                                                            | ATAACCACCAACATCTCAGCTCCC  | GCTTTCGTCATGTTCACTGGCTTC     |
| Protein tyrosine phosphatase, receptor type, M (PTPRM)                           | CCCCTGCATCGACTTTCCTACTACT | TGCGTAGTTTGATATCCCGACACC     |
| Protein tyrosine phosphatase, receptor type, T (PTPRT)                           | AACTCCAGCCAGATCAAAGACGAG  | ACTTTGAGCAGAGAGCGCTTAGAG     |

|                                                                              |                           |                            |
|------------------------------------------------------------------------------|---------------------------|----------------------------|
| DBA/2J protein tyrosine phosphatase, receptor type, deltaA (Ptprd)           | TCAGACCTCAGAACAAGCACCATC  | ACGGAAGTAGTACAGGCTGTTTGG   |
| Tyrosine phosphatase LAR (Ptprf)                                             | CCCAAGAACCGCTATGCAGATGTC  | GGCCATAGATGTCAACCGTCTTCT   |
| Protein tyrosine phosphatase, receptor type, K (Ptprk)                       | TGACTTTGAGTGGGTCCATGTCAG  | GCACTGAAATGTAGCATTCTGCCC   |
| Protein tyrosine phosphatase PTPT9                                           | ATGAGAACGTGTACGAGTGTGTGG  | AGTGATATTCACATTCACCGGG     |
| FMS-like tyrosine kinase 1 (Flt1)                                            | TGTCTGCTTCTCACAGGATATGGC  | ATAGTTTGTCTGGTACAGGTGCC    |
| Flt3 mRNA for tyrosine kinase receptor of the PDGF                           | AACCCTTGTGGATCAGGTGTAAGG  | AAACTCCTTCTGGGATTCCTCCG    |
| Tyr kinase receptor 1                                                        | ATCAAGAAGGACGGGCTCAAGATG  | ACGCTGTAGTTGAGGGACTCAATG   |
| Tek                                                                          | GACCATGAAGATGCGTCAACAAGC  | TCTCTTCATTGGTACAGTGGCACC   |
| Protein tyrosine kinase 7 (Ptk7)                                             | CTTAGTCGTGGACAAGCCAGTGAT  | TTCAACTTCCCGAACATCTCCACC   |
| Chondroadherin                                                               | AGTCTGGTCTTTCTTGCCATCCTC  | GGAACTTGGCTAGGTTCTCCACAT   |
| Transmembrane protein AMIGO                                                  | ATCTCTCGCTTTCCTGTGGAAGTG  | ATGGCGTAACAGGTATACACACC    |
| Transmembrane protein AMIGO 2                                                | ATCGAATCCCTTCCATACCGATGC  | GCTGCCTGTTTCATTGCGATAACAAG |
| Transmembrane protein AMIGO 3                                                | TTCAGACTTGGAGGATGTTCTGCC  | ATGTTTCAGCCAGTTGGAGGAGAG   |
| Vasorin                                                                      | TACCGCCAATGTAGAGGCATTGAG  | TGTGGGTCCCTGATAGTAGACCT    |
| Leucine rich repeat and Ig domain containing 2 (Lingo2)                      | ATCTCTTTAACCTGCGTTCCTCC   | GGTTGGTGTGGTATTGAAAGGG     |
| Leucine-rich repeat, immunoglobulin-like and transmembrane domains 1 (Lrit1) | TGCACACTTCTGGAGAACCTTAC   | GTGGCTCAGTGACAATCAAGGAGA   |
| Leucine-rich repeat, immunoglobulin-like and transmembrane domains 3 (Lrit3) | AGTGGCCAGCATAGAAACCAGTAG  | TTGGTAGCTGACATCATCACGGAC   |
| Leucine-rich repeat, immunoglobulin-like and transmembrane domains 2 (Lrit2) | ATTCTGTCCCAGAACTGGCTCTTC  | GCGAGGCCAACACATCAAATTCTC   |
| Immunoglobulin superfamily containing leucine-rich repeat (Islr)             | CAATGACAACCCTTTCGACTGCAC  | GTGGCCAATGCCACATTTACAGAG   |
| Leucine rich repeat and fibronectin type III domain containing 1 (Lrfn1)     | ACTGACCGCTATTTCTGGTCCATC  | GCAGAGCTGTTGTATTGCACTTGG   |
| Leucine-rich repeats and immunoglobulin-like domains 1 (Lrig-1)              | CAGCTGCTGGTTGTTTCAGAATGTG | TGCAGTCACTACATACAGCAGAGC   |
| Leucine-rich-repeat protein (NLRR-1)                                         | AGGAGGTCCTAATCCAGGACTCAA  | TCATGAACATCTACTGGCACCCTG   |
| Leucine rich repeat protein 2, neuronal (Lrrn2)                              | ATGTGCAGGAGACACCCCATATC   | GCGGAACTTCAGCAATGTTGAGAC   |
| Leucine rich repeat protein 3, neuronal (Lrrn3)                              | AACCTCACGGAATACCAGACGAC   | ACATCCAGGTCAGAAGGAAAGCTC   |
| Leucine rich repeat and Ig domain containing 1                               | TTGACCAAGCTGGACATCAGTGAG  | TAGTTGAGCCCACGAAAGGCATAG   |
| Hypothetical leucine-rich repeat containing protein                          | TAGCCAATAGCACCAGTTGTGACC  | AAGACCAGAACAGAAGCGACGATG   |

|                                                                            |                           |                           |
|----------------------------------------------------------------------------|---------------------------|---------------------------|
| Leucine rich repeat containing 4B (Lrrc4b)                                 | CACCTCAATCACCACCACTACGTT  | TGACGCAAACCTCCCTTCAGTATC  |
| Leucine rich repeat and fibronectin type III domain containing 5           | ATCCACTAAGTCAGGCTCGAATGC  | CATGGCTTGTTTGGACATGGACTG  |
| Leucine-rich repeats and immunoglobulin-like domains 2 (Lrig2)             | GCCTTGATGAATCTGCCTTTGTGG  | CAATTGTGCTTTCAGGGTGTGTCC  |
| Peroxidasin homolog                                                        | ATAGAAACGCTGGACCCTGAATCC  | TCCAGCAAGTTTAAGCGAGAGTCC  |
| Immunoglobulin superfamily containing leucine-rich repeat 2 (Islr2)        | AACCCTACCGTTTAATCCTGAGGC  | AATTCGGCCCCTCCTAGAAATCC   |
| RIKEN, clone:6430402H13                                                    | TCTTCCTCACCAACATCACACTGG  | TCAGCAATGGATCTCATAGGCCAC  |
| V-set and immunoglobulin domain containing 10 (Vsig10)                     | TTCCTGGTCTCCTTCAATTCCAGC  | CAGTGTTCAGCTTTGAGTTCCC    |
| RIKEN 2210407G14                                                           | TGCACTCATGAACAGGGAGACTTC  | TTGATGCTCCCGTCACTACTTTCG  |
| Roundabout homolog 3 (Robo3)                                               | ACTGGTACTTGGCTCTTCTGTGTG  | TTTGAACAGGCTCAGAGACAGGAC  |
| RIKEN 8030485G08                                                           | ACACGTGTGAGATGTCCAATACCC  | AGTGATCCATTAAAGCGGTCCCTCG |
| Adhesion G protein-coupled receptor F5 (Adgrf5)                            | AGCAAGAGAAGAGCAGCCTATTCC  | AAGTCTGCAGAGAGAGCACGTTAC  |
| Immunoglobulin superfamily, member 8 (IGSF#8)                              | TCCCTGCTATGCAACATCTCTGTG  | ACAGTCAACACCTGCAAGAAGTGG  |
| Hemicentin 1                                                               | AGCGAGCCAGAGGAAGTGTTATTG  | AATGGTGTGGTTCCACGTATAGGG  |
| Similar to mucosa associated lymphoid tissue lymphoma translocation gene 1 | ACAGTCACAGAAGTGGAGCGACTTC | TCCACATATGGAACCGTGTAGTGC  |
| Differentiation antigen (CD22)                                             | GCCAGTCCAAGTGCAACAAACTAC  | TGCACGAGACTCCCATTCTTCTTC  |
| HEPACAM family member 2 (Hepacam2)                                         | TGGTTCCTGACTTGGAAATACCAGC | GCAACTTCTAAATGAGGCCCATGC  |
| Hepatitis virus receptor                                                   | ATGTCACGAGGAATGACACAGGAC  | CTGACGCTGACTGGATTTCGAGATT |
| SPEG complex locus                                                         | ACGTTCAAGGTCTCACTCATGGAC  | TCACAGACACACAGACGGACAAAC  |
| Platelet/endothelial cell adhesion molecule 1 (Pecam1)                     | CCAATGACCCAGCAACATTCACAG  | TCTCGCTGTTGGAGTTCAGAAGTG  |
| Secreted and transmembrane 1A                                              | GCACAGCTTGTGATCAAAGACACC  | CAGCAGACTGAACAAAGCCATGTG  |
| Hypothetical Microbodies C-terminal targeting signal containing protein    | TGTTGATGACACTGGACATCCCTG  | TTACCAACTTTGGAGGAAGGACCC  |
| Alpha-1-B glycoprotein (A1bg)                                              | GCTACCGGATGCACAAATACATGC  | TAAGCTGAGGTGCTTCTTGTGGAG  |
| Hypothetical Immunoglobulin subtype containing protein                     | TGTCACTGTACATTCCACAGTCGG  | TCATCTCAATCTCCTCAGTGGTGC  |
| Immunoglobulin superfamily, member 10 (Igsf10)                             | TGGTGGTGACTACTTATGTGTGGC  | TACTTCCCAGAGTCAAGCGGTTTC  |
| Lymphocyte antigen 9 (Ly9)                                                 | GTGCACATGATGAACGGAATCTGC  | ATGGGTGACCAAGTCATACACCTG  |
| Basigin                                                                    | AGAAGCGAGATCAATGTGGAAGGG  | TTCCTCTGGCGTACATTCTTGTC   |
| Neuroplastin (Nptn)                                                        | TGTAAGTCAAGTCAGTTGGCTACC  | GGTCATTGTGGTGTGCTCACTTG   |

|                                                                                            |                          |                           |
|--------------------------------------------------------------------------------------------|--------------------------|---------------------------|
| Hypothetical Immunoglobulin and major histocompatibility complex domain containing protein | AGTCTGTGGTGCTCTCAATGTCAC | GGTGAAGAGCAGAACACTGAGGAT  |
| V-set immunoregulatory receptor (Vsir)                                                     | TCCAGCAGTCTCTTTCTGCTCTTG | GCTGTCACTGTCCTGCTCATTAGA  |
| F2 alpha prostaglandin regulatory protein (FPRP)                                           | TACTATCTTTGCCTTGTGGCCCTC | GTATTCCTGCAGCAAAGAAAGGC   |
| Immunoglobulin superfamily, member 3 (Igsf3)                                               | TAAGGTGGCCAAAGAGAGTGATGG | AAGTCAAAGGAGTCGCTGTAGGTG  |
| Embigin                                                                                    | GGGCAACACCTTAACCAGTCAGTA | TCTTTCCCAGCATCTGGGTCATTC  |
| Nexilin                                                                                    | AAGGCCTGCAAAGAAGAGTGAGTC | CGCTGCTGAGCCTTTATTGTTGAC  |
| Myelin protein zero-like 2 (Mpzl2)                                                         | TGACGACAATGGGACATACACCTG | ACCGTAGCAACGAAGGTAAGTCTG  |
| Sodium channel, voltage-gated type III, beta (Scn3b)                                       | GTCTGCTTCCCTGTGTGTGTAGAA | TGCTGTACATCACCTCAAGTCAC   |
| Adhesion molecule, interacts with CXADR antigen 1                                          | ATCCAGAGCACAGAAGAGAAACGG | ATTCATGGTCATGTAGGTGCCCTC  |
| Immunoglobulin-like receptor PIRA1                                                         | AGGAGGAAACATGACACTCCACTG | ACTGTGTGGTTAGGCTTCACTGAG  |
| Adipocyte-specific protein 3 (ASP3)                                                        | TATTAAGTCGCGCATACTGGGACG | ACTCCACCATGTTACATCCTTCC   |
| V-set and transmembrane domain containing 2B (Vstm2b)                                      | TTACTCGCTGGAGATTCAGTGGTG | TGCTAACAAGAGCAGAGACAGCAG  |
| Immunoglobulin-like domain containing receptor 1 (Ildr1)                                   | TTACTCTGTTTGCCTCCGTTACCC | AGATGAAACTTGGGAGCTCCTGTC  |
| Fc receptor-like S, scavenger receptor (Fcrls)                                             | CTTGCTTGTCTGTGGCTAAAGGC  | TGTCCCAGCCATCATCACATACAG  |
| Collagen, type XXV, alpha 1 (Col25a1)                                                      | GGTGATAAGGGAGAACAAGGTG   | ATGGAGGTTGCCATTGTAGTCTATG |

### 3. Neuropeptides/Calcium Binding Proteins

| Annotation                            | Forward Primer           | Reverse Primer           |
|---------------------------------------|--------------------------|--------------------------|
| Calbindin                             | -                        | -                        |
| Calretinin                            | -                        | -                        |
| Cholecystokinin (Cck)                 | ATGAAGAGCGGCGTATGTCTGTGC | CTACGATGGGTATTCGTAGTCCTC |
| Corticotropin releasing hormone (Crh) | ATGCGGCTGCGGCTGCTGGTG    | TCATTTCGATAATCTCCATCAG   |
| Neuropeptide Y (NPY)                  | -                        | -                        |

**Supplementary table.** The list of genes that were initially screened but not further pursued.

**A.** Summary of results from *in situ* hybridization (ISH) or immunohistochemistry (IHC). The table also contains gene ID number or antibody information. **B.** Primer sequences to generate *in situ* probes are indicated when ISH was conducted to examine gene expression.

## A. Layer 1

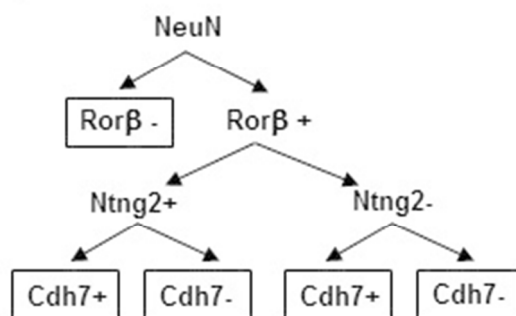

## B. Layers 2, 3 and 4

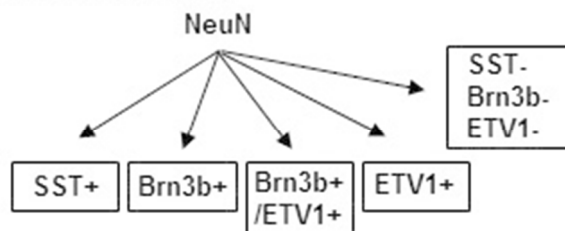

105x140mm (72 x 72 DPI)

Using double labeling (either *in situ* hybridization or immunostaining), the authors discover that mouse superficial superior colliculus consists of at least 10 different neuronal types and 4 different layers. Each neuronal type or distinct layer has unique molecular features.
